# Supplementary material
Source: publisher figshare collection journal article supplement (https://acs.figshare.com/ndownloader/files/6574089)
Supplement: Supplementary file 1 [file 6574089]

Supporting Information for:

**Determining the Fate of a Non-heme Iron Oxidation Catalyst Under Illumination, Oxygen, and Acid**

*Samuel L. Esarey, Joel C. Holland, and Bart M. Bartlett\**

Department of Chemistry, University of Michigan, 930 North University Avenue, Ann Arbor, MI 48109, United States

| <i>Index</i>                                                                                                                                        | <i>Page</i> |
|-----------------------------------------------------------------------------------------------------------------------------------------------------|-------------|
| <b>Figure S1.</b> $^1\text{H}$ NMR spectrum of bpmcn ligand in $\text{CDCl}_3$                                                                      | S1          |
| <b>Figure S2.</b> $^{13}\text{C}$ NMR spectrum of bpmcn ligand in $\text{CDCl}_3$                                                                   | S2          |
| <b>Figure S3.</b> FTIR spectrum of the bpmcn ligand                                                                                                 | S3          |
| <b>Figure S4.</b> ESI-MS(+) spectrum of bpmcn ligand                                                                                                | S3          |
| <b>Figure S5.</b> $^1\text{H}$ NMR spectrum of $\text{Fe}(\text{bpmcn})\text{Cl}_2$ in $\text{CD}_3\text{CN}$                                       | S4          |
| <b>Figure S6.</b> $^1\text{H}$ NMR spectra of $\text{Fe}(\text{bpmcn})\text{Cl}_2$ under $\text{N}_2$ before and after 1-sun illumination           | S5          |
| <b>Figure S7.</b> $^1\text{H}$ NMR spectra of $\text{Fe}(\text{bpmcn})\text{Cl}_2$ under $\text{O}_2$ before and after 1-sun illumination           | S6          |
| <b>Figure S8.</b> UV-Vis spectra of $\text{Fe}(\text{bpmcn})\text{Cl}_2$ in AcN with 550 nm cutoff                                                  | S7          |
| <b>Figure S9.</b> UV-Vis spectra of $\text{Fe}(\text{bpmcn})\text{Cl}_2$ in AcN w/ 30%-w/w $\text{H}_2\text{O}_2$                                   | S8          |
| <b>Figure S10.</b> UV-Vis spectra of $\text{FeCl}_2$ in AcN under $\text{N}_2$                                                                      | S9          |
| <b>Figure S11.</b> Resonance Raman spectra of $\text{Fe}-^{32}\text{O}_2$ & $\text{Fe}-^{36}\text{O}_2$ raw data                                    | S10         |
| <b>Figure S12.</b> Resonance Raman spectra of acetonitrile & $\text{Fe}(\text{bpmcn})\text{Cl}_2$                                                   | S11         |
| <b>Figure S13.</b> SQUID data for $\text{Fe}(\text{bpmcn})\text{Cl}_2$ pre- and post- $\text{O}_2$ /irradiation                                     | S12         |
| <b>Figure S14.</b> ESI-MS $^+$ $\text{Fe}(\text{bpmcn})\text{Cl}_2$ after $\text{O}_2$ & 1-sun illumination                                         | S13         |
| <b>Figure S15.</b> ESI-MS $^+$ $\text{Fe}^{3+}-^{32}\text{O}_2^-$ vs $\text{Fe}^{3+}-^{36}\text{O}_2^-$                                             | S14         |
| <b>Figure S16.</b> FTIR spectra of $\text{Fe}-^{32}\text{O}_2$ vs $\text{Fe}-^{36}\text{O}_2$                                                       | S15         |
| <b>Figure S17.</b> $^1\text{H}$ NMR spectra of $\text{Fe}(\text{bpmcn})\text{Cl}_2$ pH 1 <i>d</i> -TFA in $\text{D}_2\text{O}$                      | S16         |
| <b>Figure S18.</b> $^1\text{H}$ NMR spectra of $\text{Fe}(\text{bpmcn})\text{Cl}_2$ vs dissociated complex pH 1 <i>d</i> -TFA/ $\text{D}_2\text{O}$ | S17         |
| <b>Figure S19.</b> UV-Vis spectrum of bpmcn ligand/ $\text{FeCl}_2$ in pH 1 TfOH                                                                    | S18         |
| <b>Figure S20.</b> Kinetics plot $\ln[\text{Fe}]$ vs time pH 3 via UV-Vis spectroscopy                                                              | S19         |
| <b>Figure S21.</b> OER data $\text{Fe WO}_3$ over 12 hours                                                                                          | S20         |

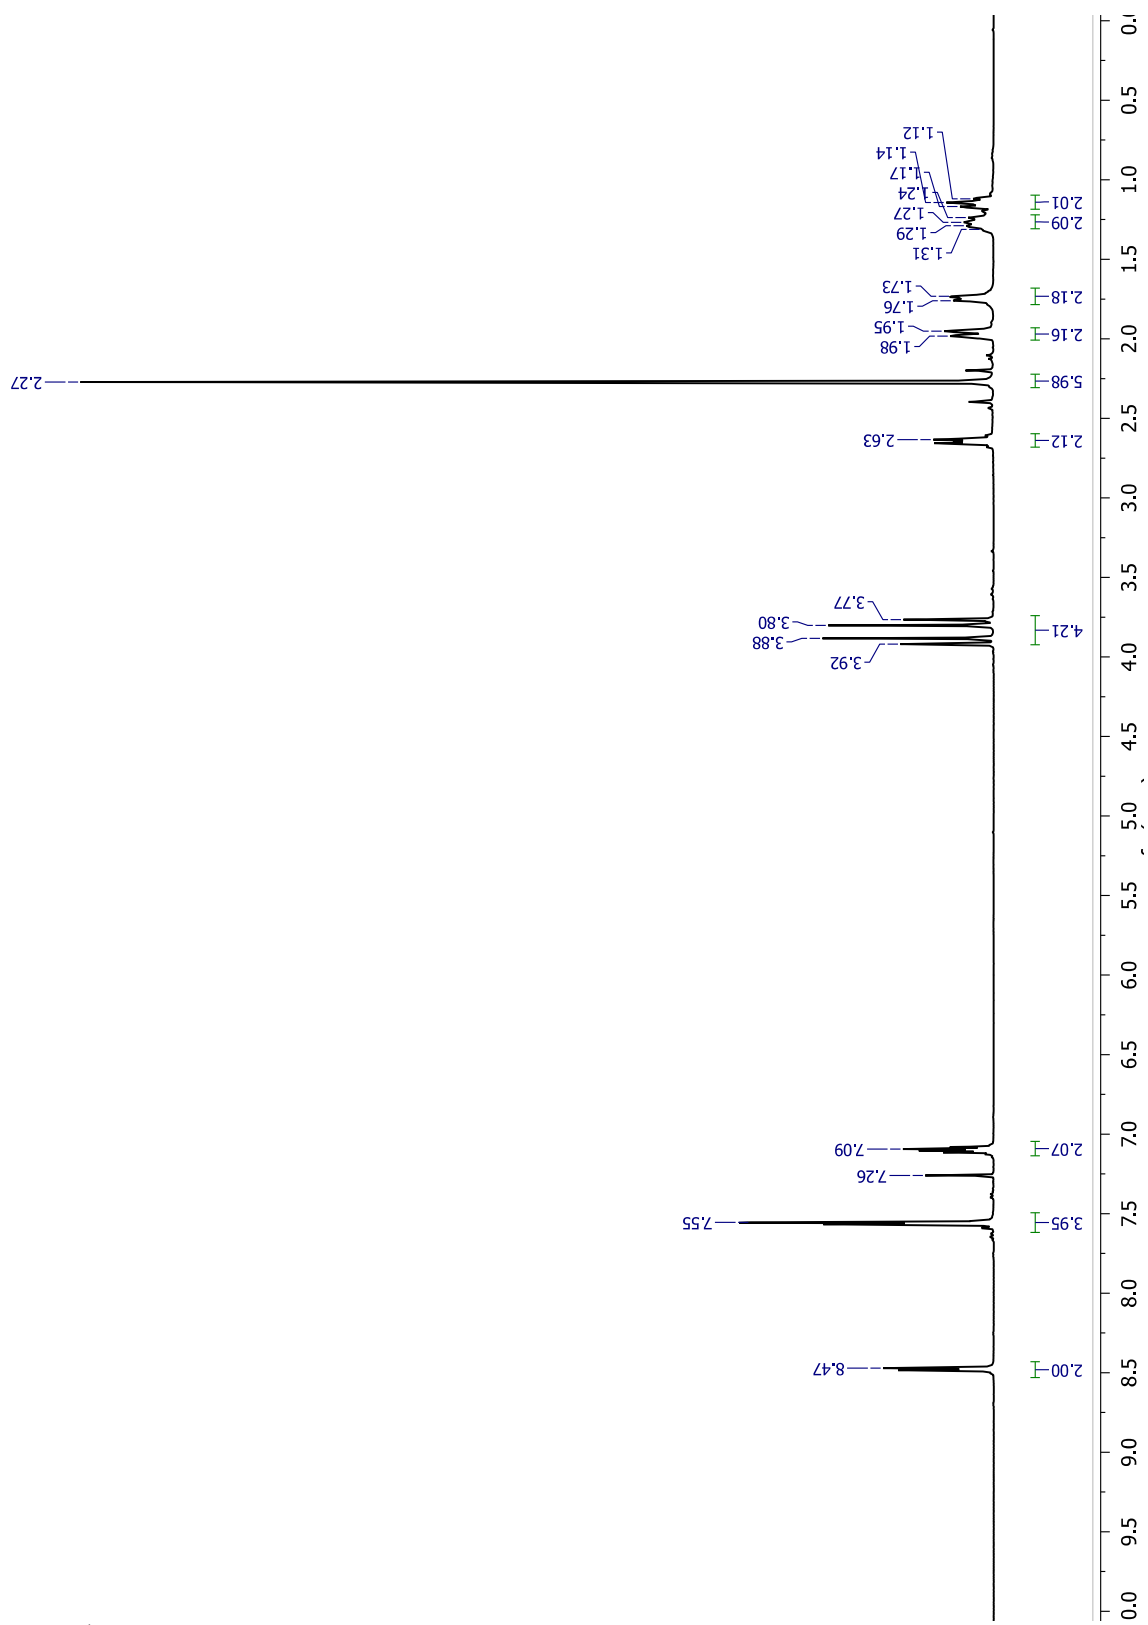

**Figure S1.** <sup>1</sup>H NMR spectrum of bpmcn ligand in CDCl<sub>3</sub>

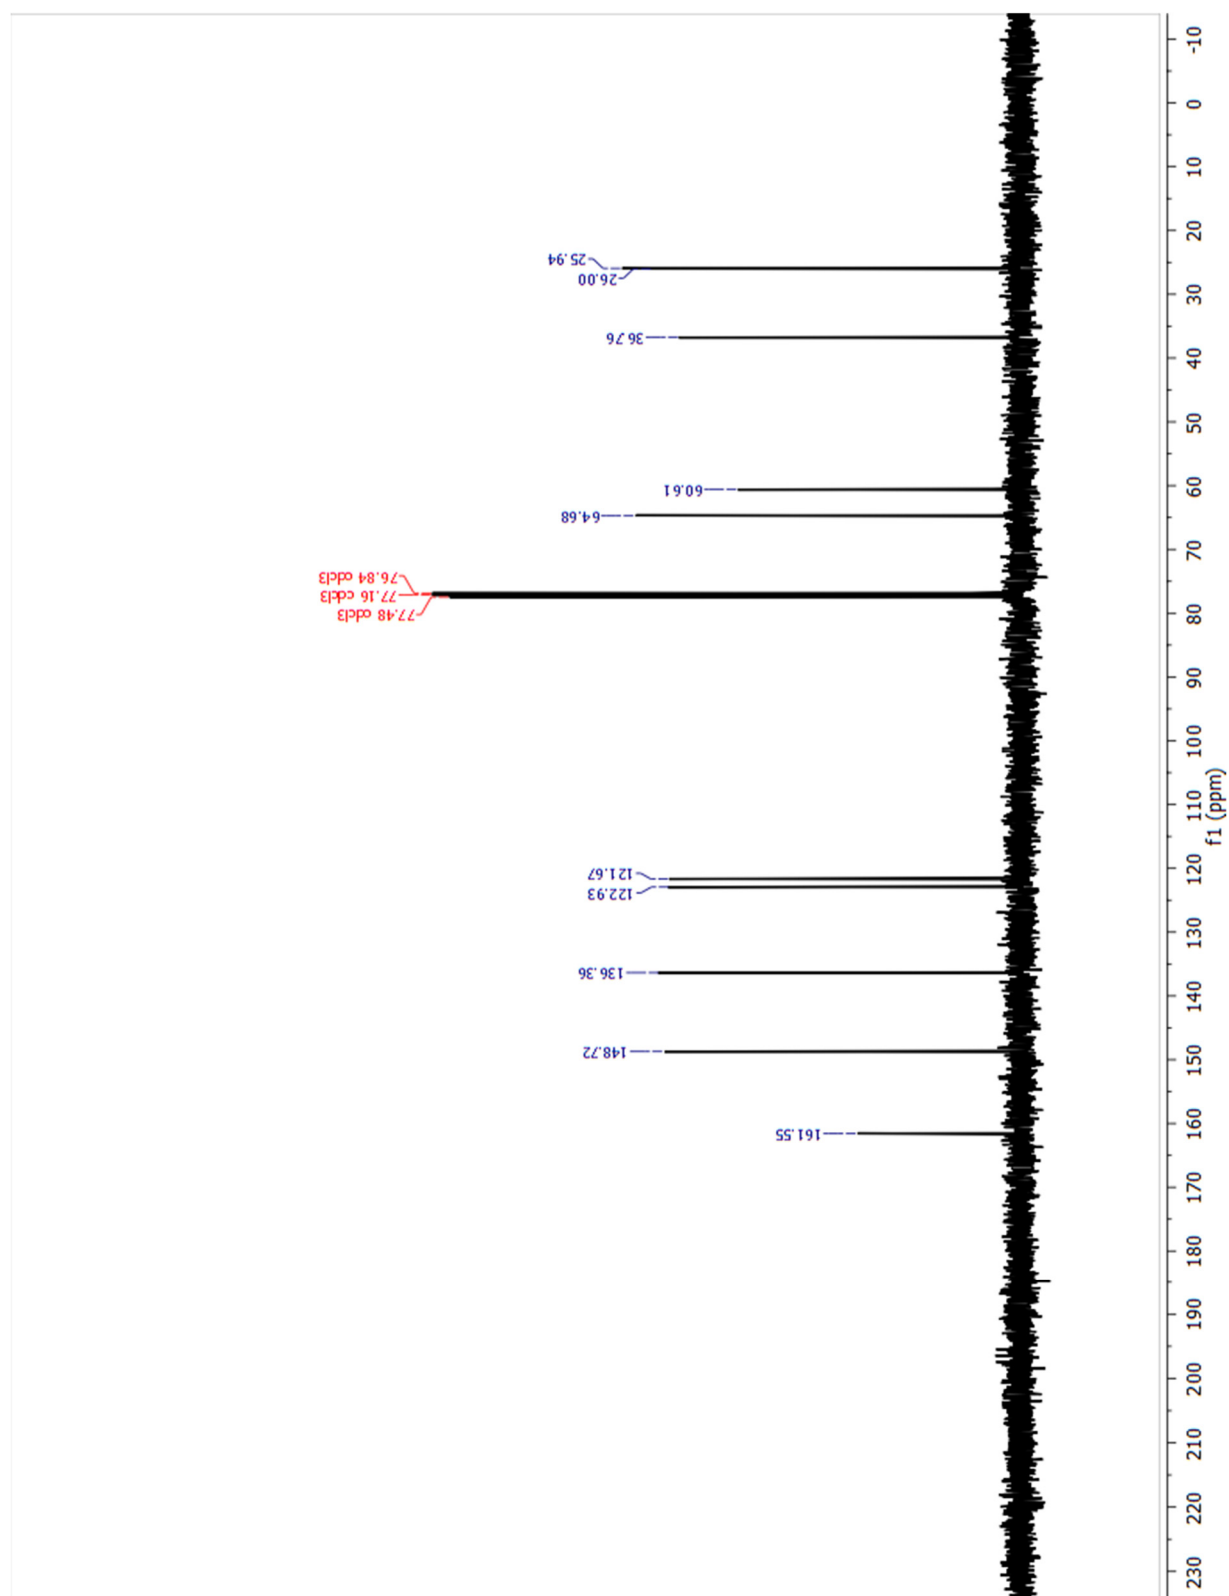

**Figure S2.** <sup>13</sup>C NMR spectrum of bpmcn ligand in CDCl<sub>3</sub>

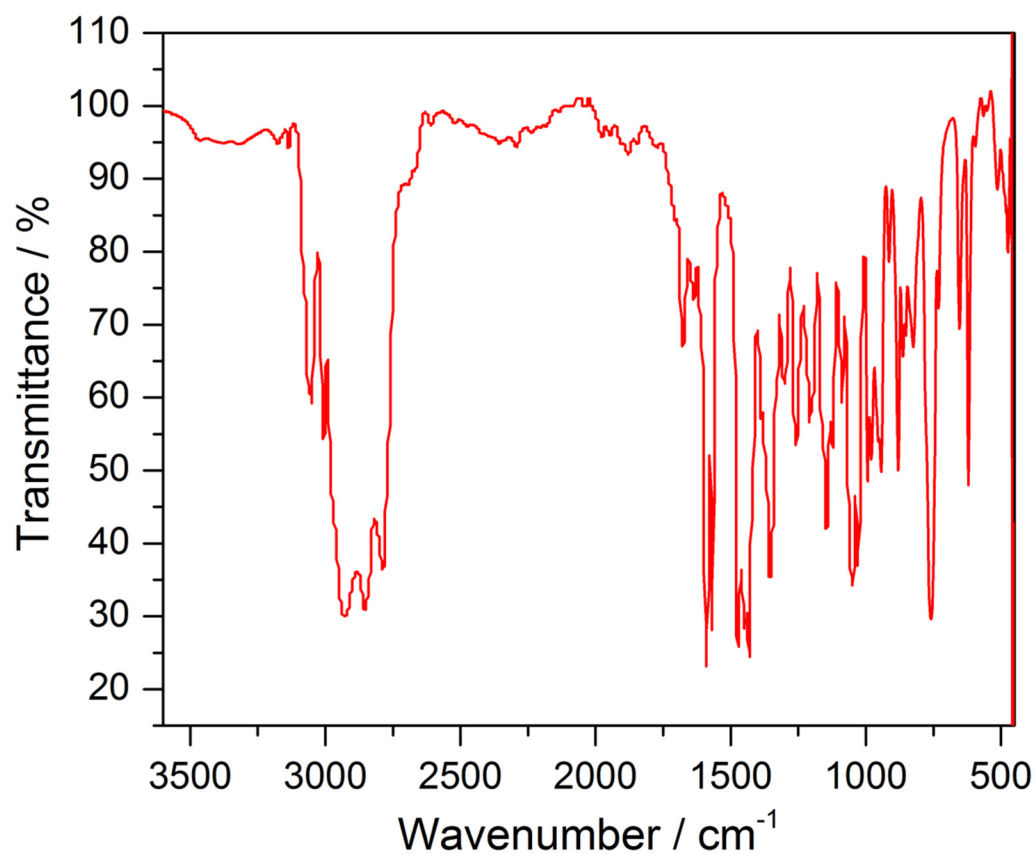

**Figure S3.** FTIR spectrum of the bpmcn ligand

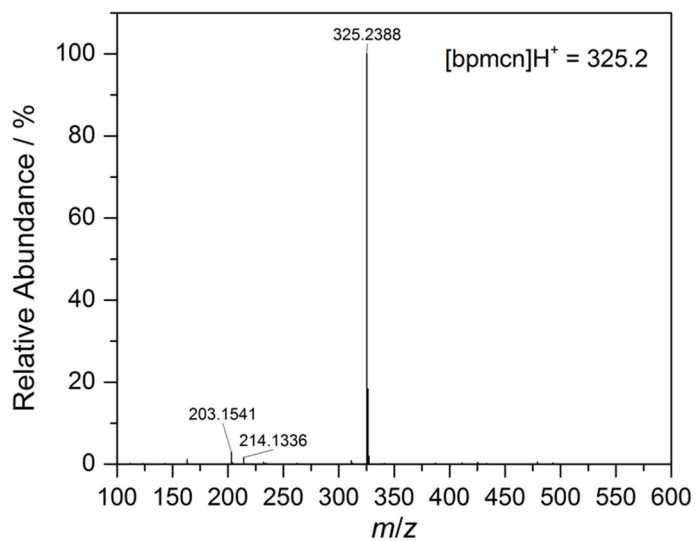

**Figure S4.** ESI-MS(+) spectrum of purified bpmcn ligand

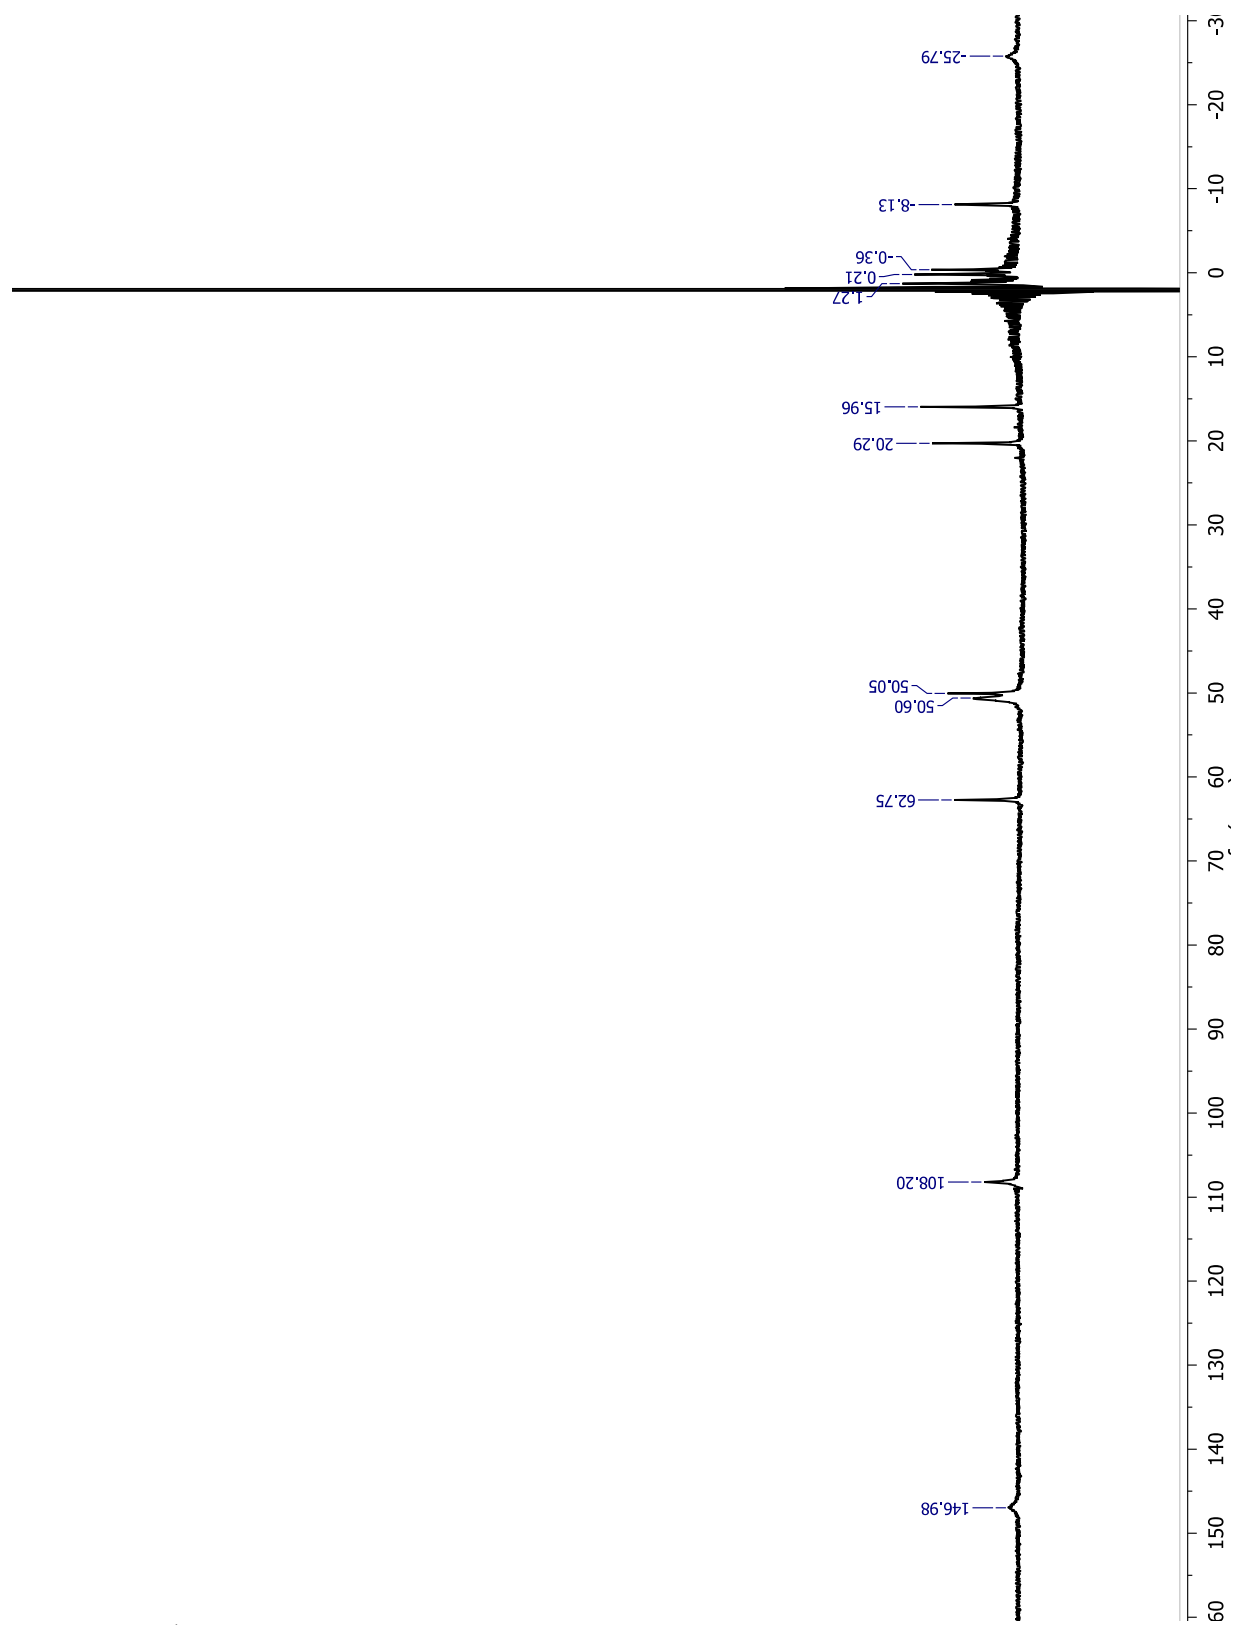

**Figure S5.**  $^1\text{H}$  NMR spectrum of  $\text{Fe}(\text{bpmcn})\text{Cl}_2$  in  $\text{CD}_3\text{CN}$

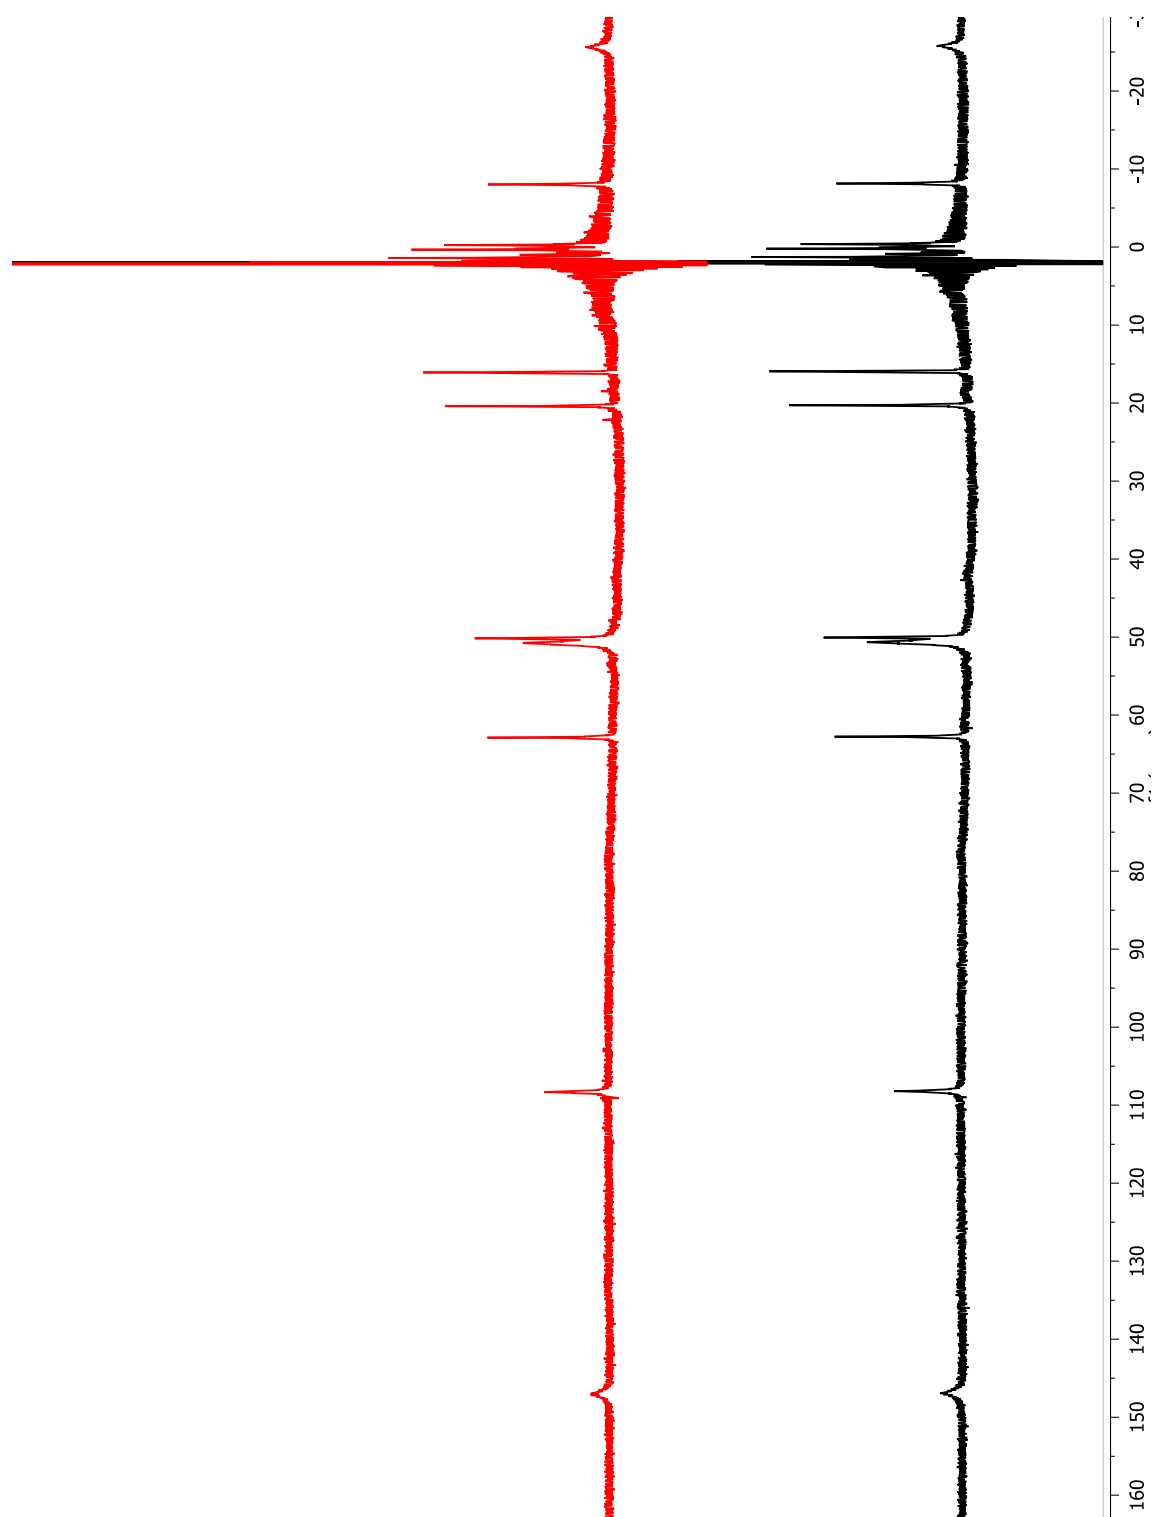

**Figure S6.**  $^1\text{H}$  NMR spectra of a solution of  $\text{Fe}(\text{bpmcn})\text{Cl}_2$  in dry  $d_3\text{-CD}_3\text{CN}$  under  $\text{N}_2$  (black) in the dark and (red) under 1 sun of illumination for  $t = 24$  hours.

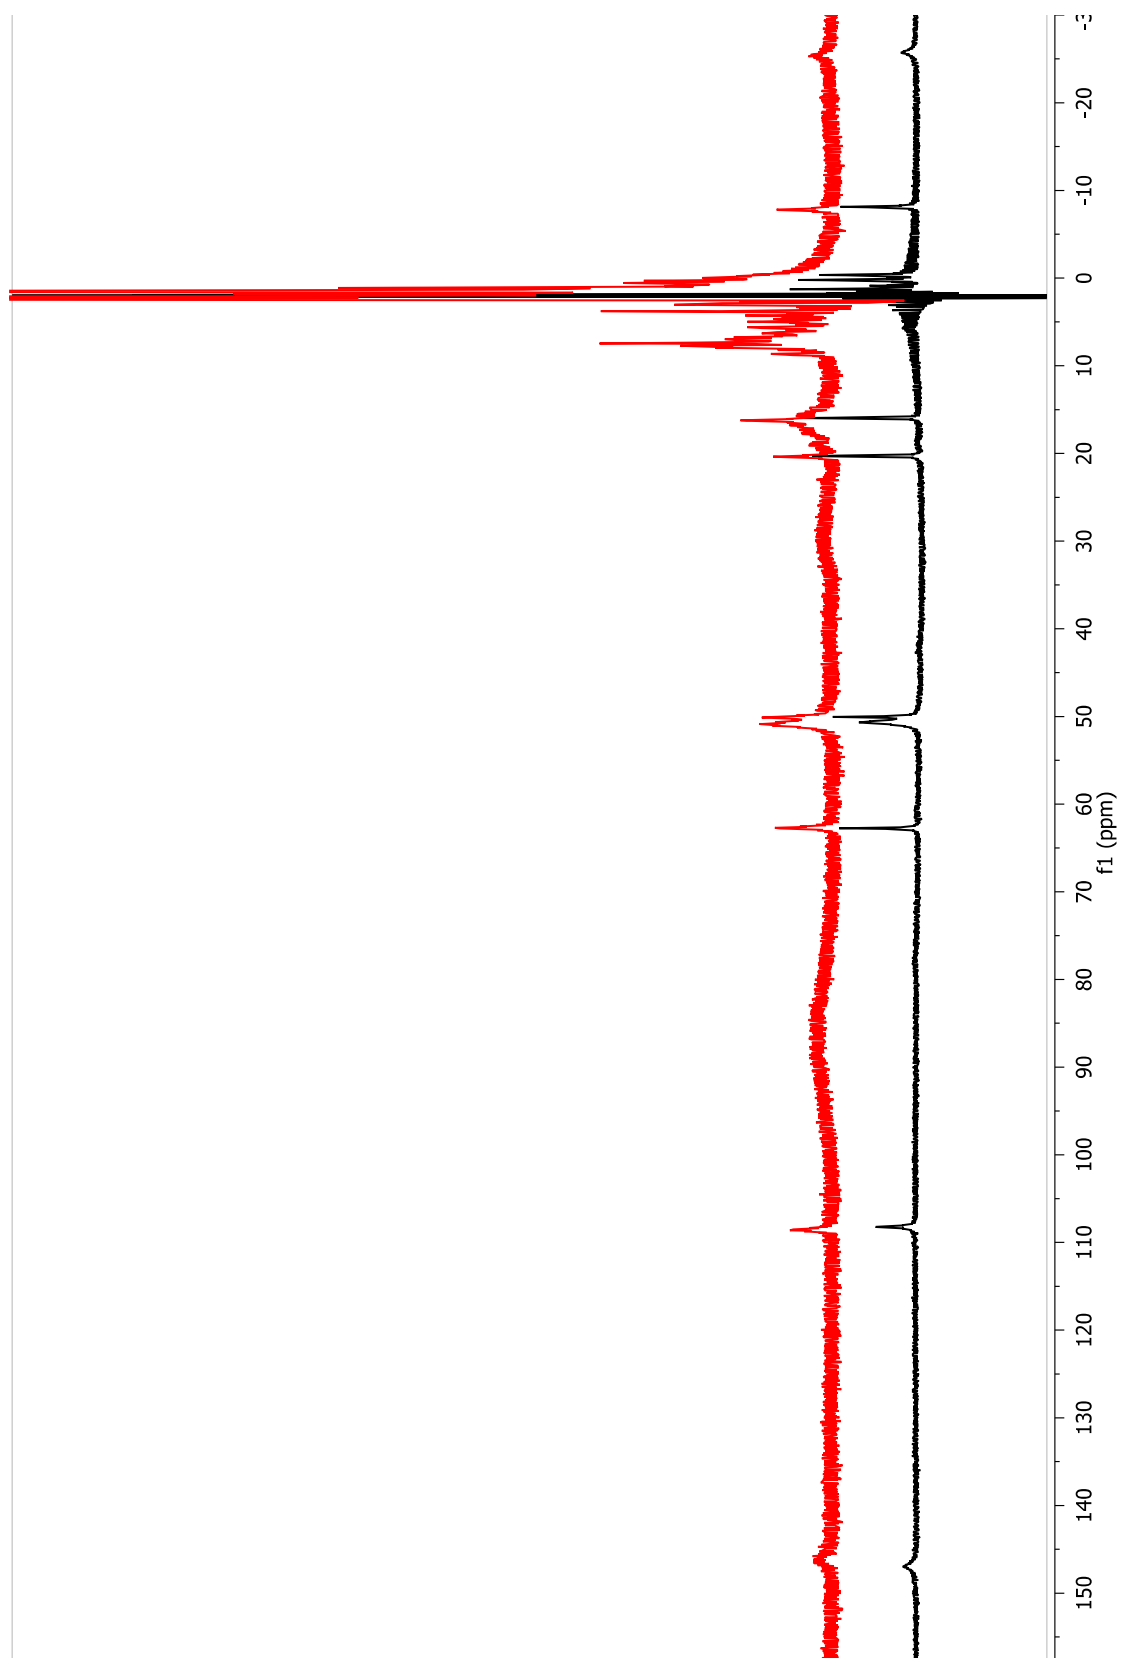

**Figure S7.**  $^1\text{H}$  NMR spectra of  $\text{Fe}(\text{bpmcn})\text{Cl}_2$  (black) in the dark and (red) after exposure of 1 sun illumination under  $\text{O}_2$  for 24 hours in dry acetonitrile.

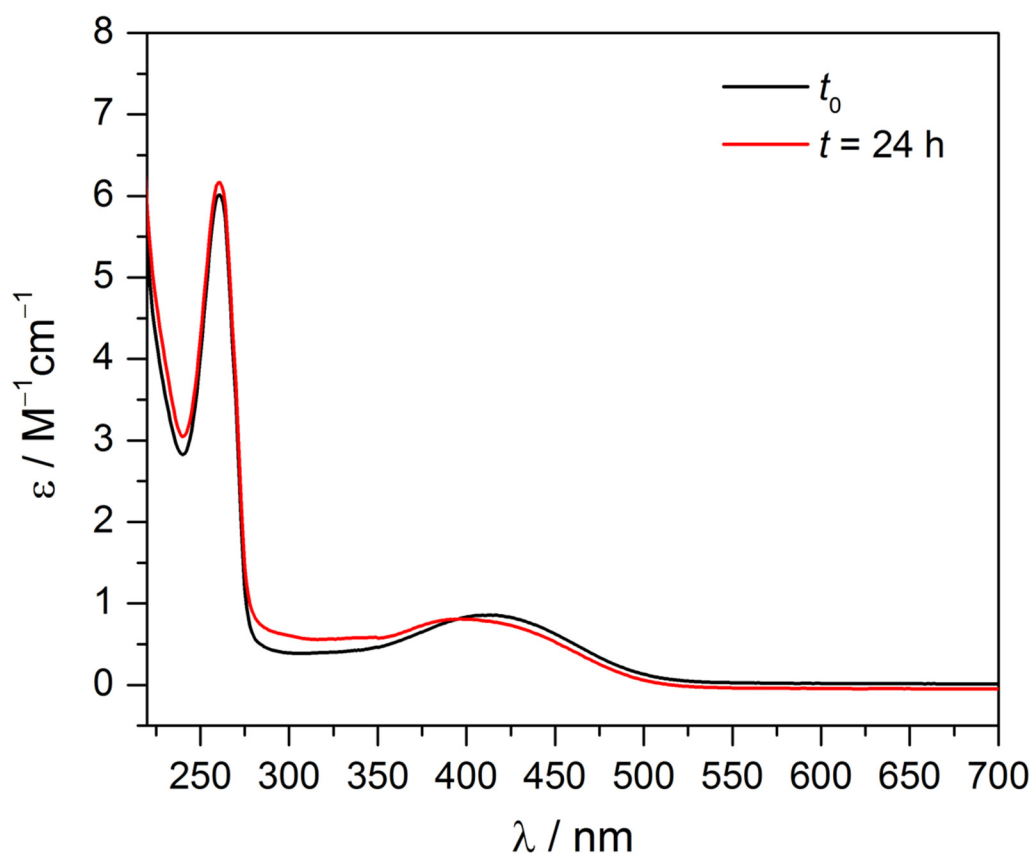

**Figure S8.** UV-Vis spectra of Fe(bpmcn)Cl<sub>2</sub> under O<sub>2</sub> (black) in the dark and (red) under illumination at 1.5 W with a Xe lamp and 550 nm cutoff filter equipped.



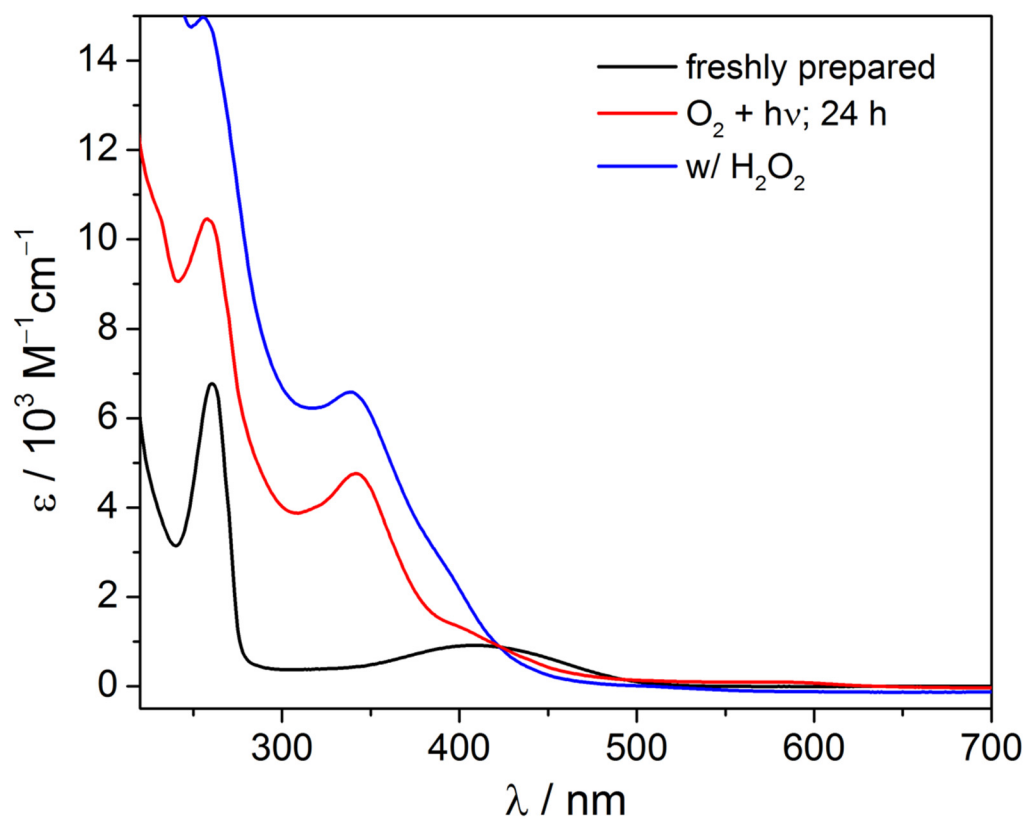

**Figure S9.** UV-Vis spectrum of 0.2mM Fe(bpmcn)Cl<sub>2</sub> (black) prior to and (red) after adding 5  $\mu$ L of 30 wt-wt% H<sub>2</sub>O<sub>2</sub> (added to a 10 mL solution of the iron complex), compared to (blue) 0.2 mM Fe(bpmcn)Cl<sub>2</sub> under 1 sun illumination for 24 hours.

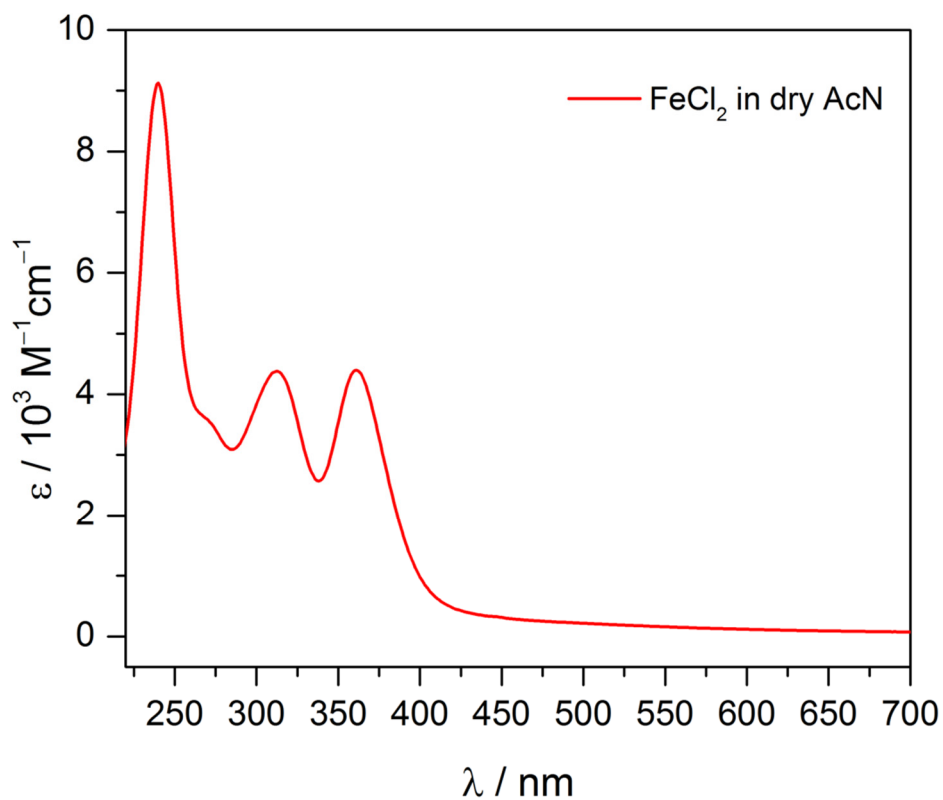

**Figure S10.** UV-Vis spectrum of FeCl<sub>2</sub> in dry acetonitrile under N<sub>2</sub>. In dry acetonitrile, absorption bands appear for FeCl<sub>2</sub> at  $\lambda_{\text{max}} = 240 \text{ nm}$ ,  $\lambda_{\text{max}} = 312 \text{ nm}$ , and  $\lambda_{\text{max}} = 361 \text{ nm}$

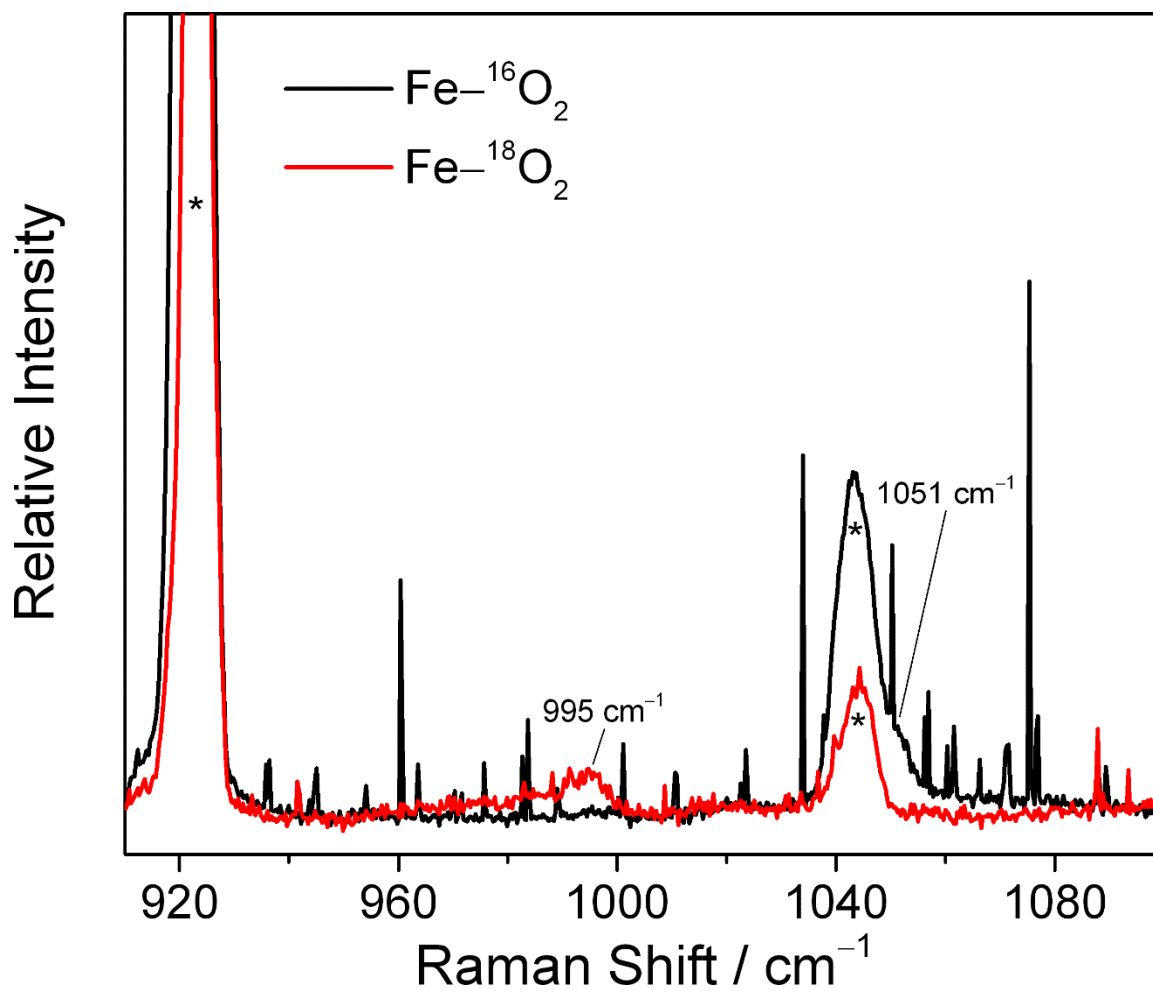

**Figure S11.** Raw resonance Raman spectra of  $\text{Fe-}^{32}\text{O}_2$  (black) and  $\text{Fe-}^{36}\text{O}_2$  (red) in dry acetonitrile, including cosmic rays detected by the detector. Solvent peaks are denoted with an asterisk.

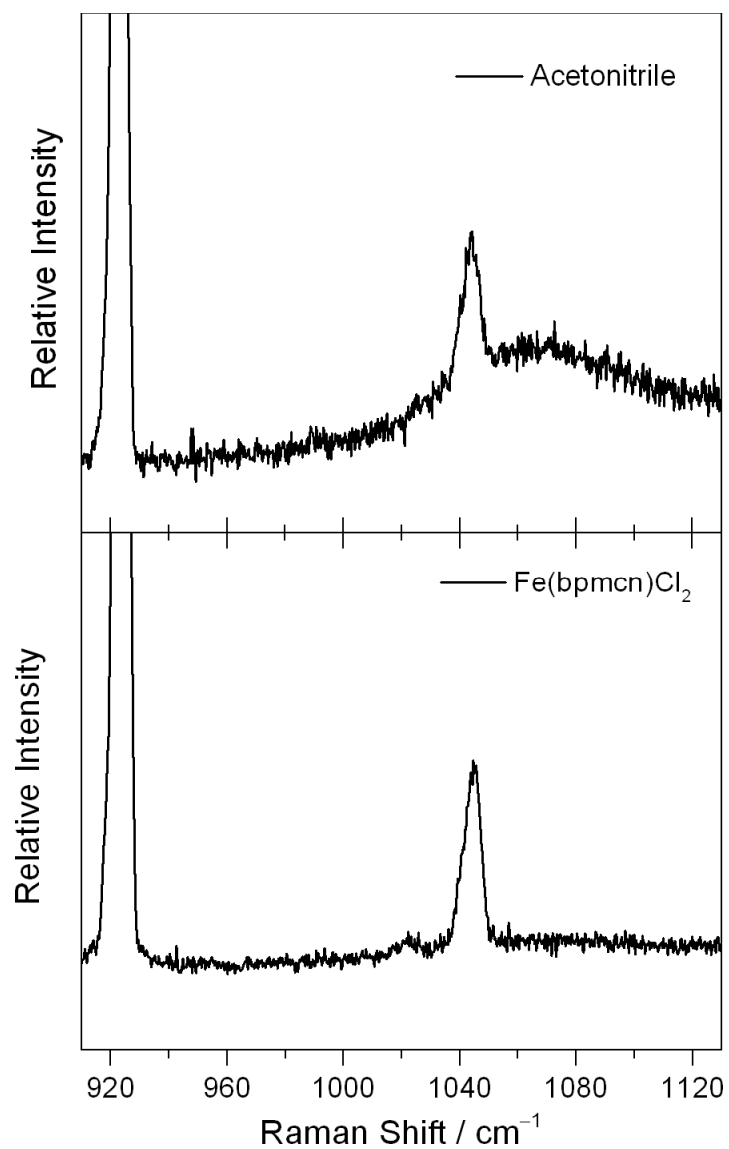

**Figure S12.** Resonance Raman spectra of (a) dry acetonitrile, and (b) Fe(bpmcn)Cl<sub>2</sub> in dry acetonitrile recorded at 77 K with 413 nm laser.

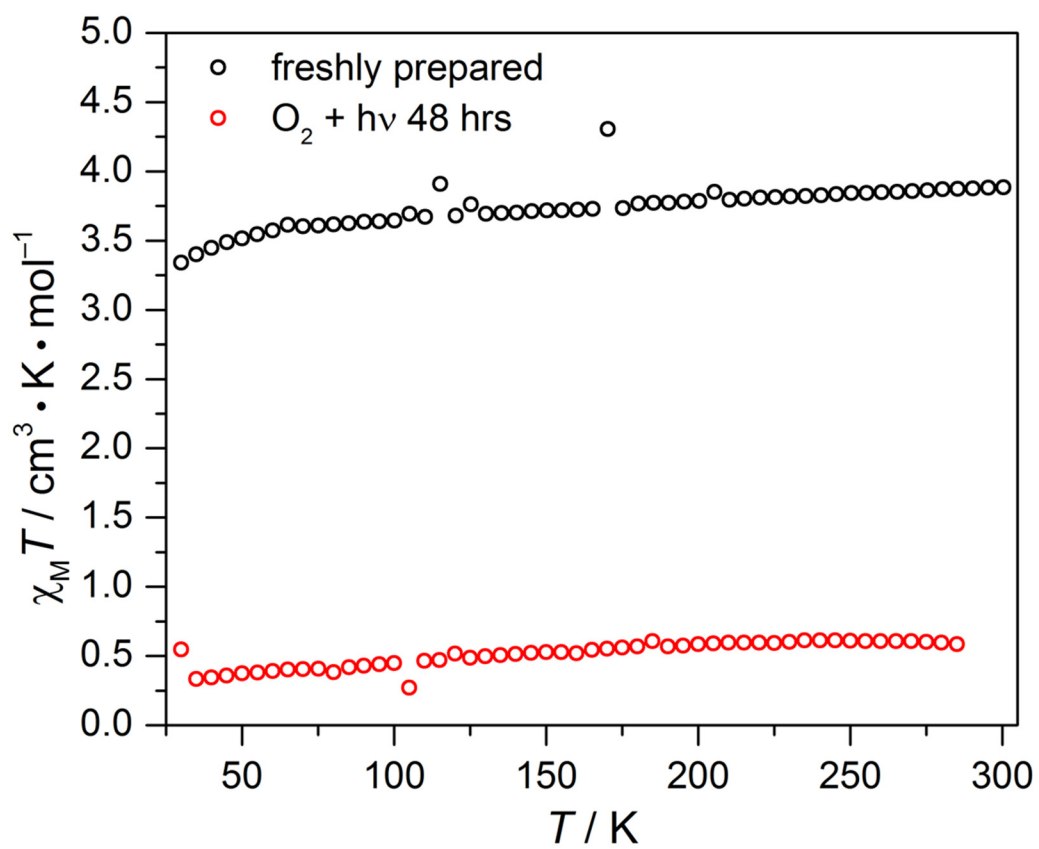

**Figure S13.** Variable-temperature magnetic susceptibility of Fe(bpmcn)Cl<sub>2</sub> (black) pre- and (red) post-exposure to O<sub>2</sub> under 1.5 W of illumination through an AM 1.5G filter.

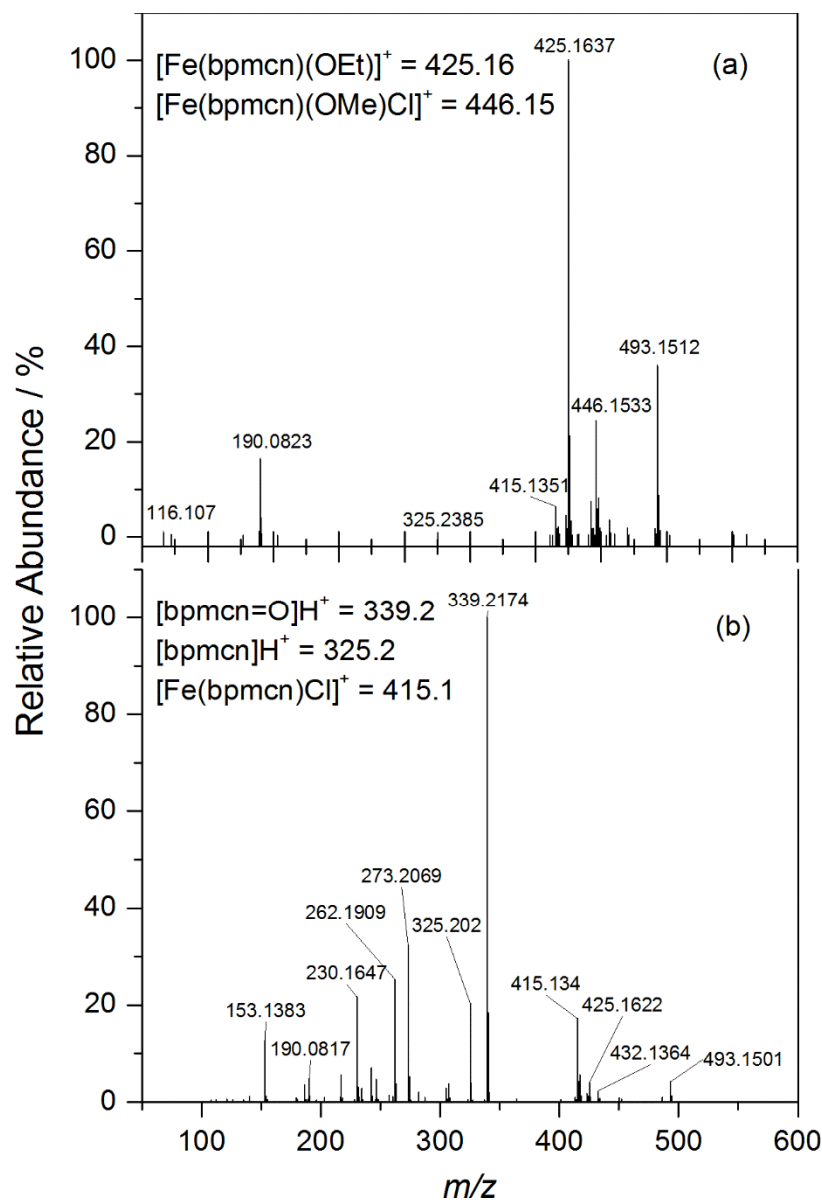

**Figure S14.** ESI-MS<sup>+</sup> spectra of Fe(bpmcn)Cl<sub>2</sub> (a) prior to and (b) after exposure to 1.5 W illumination with AM 1.5G filter for 48 hours under O<sub>2</sub>.

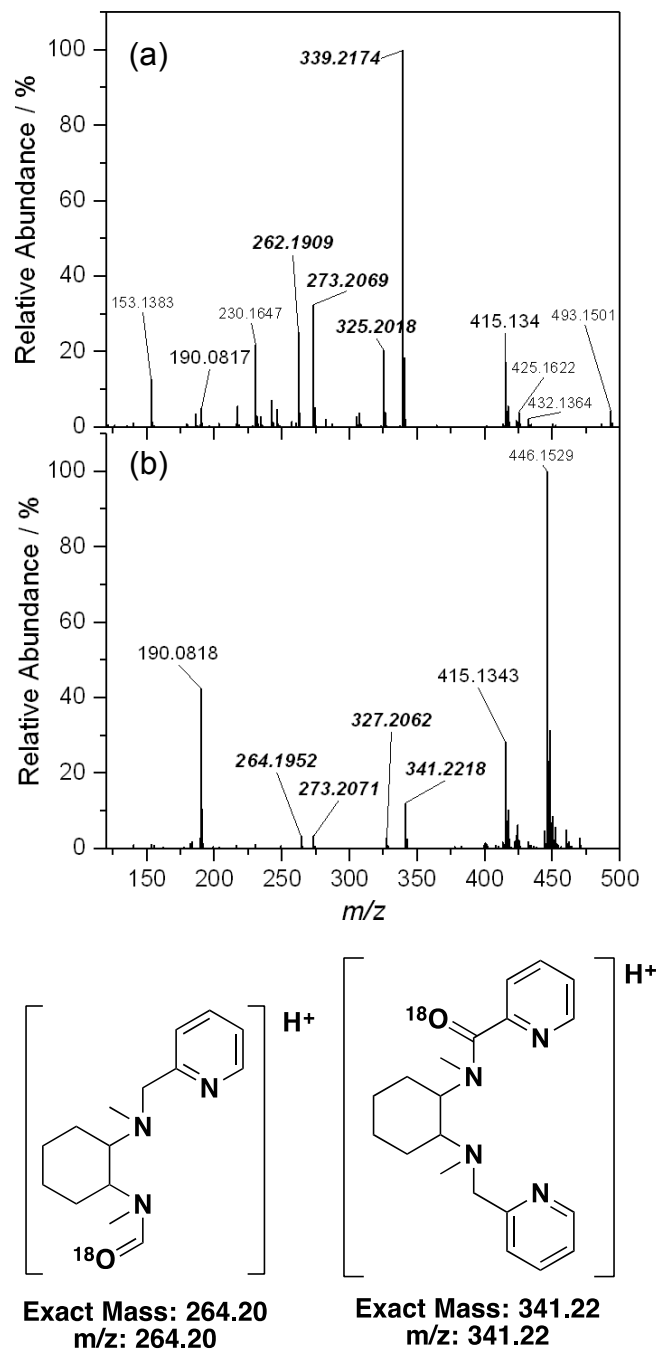

**Figure S15.** ESI-MS<sup>+</sup> spectra of Fe(bpmcn)Cl<sub>2</sub> exposed to 1.5 W illumination with AM 1.5G filter for 48 hours under (a) <sup>32</sup>O<sub>2</sub> or (b) <sup>36</sup>O<sub>2</sub>

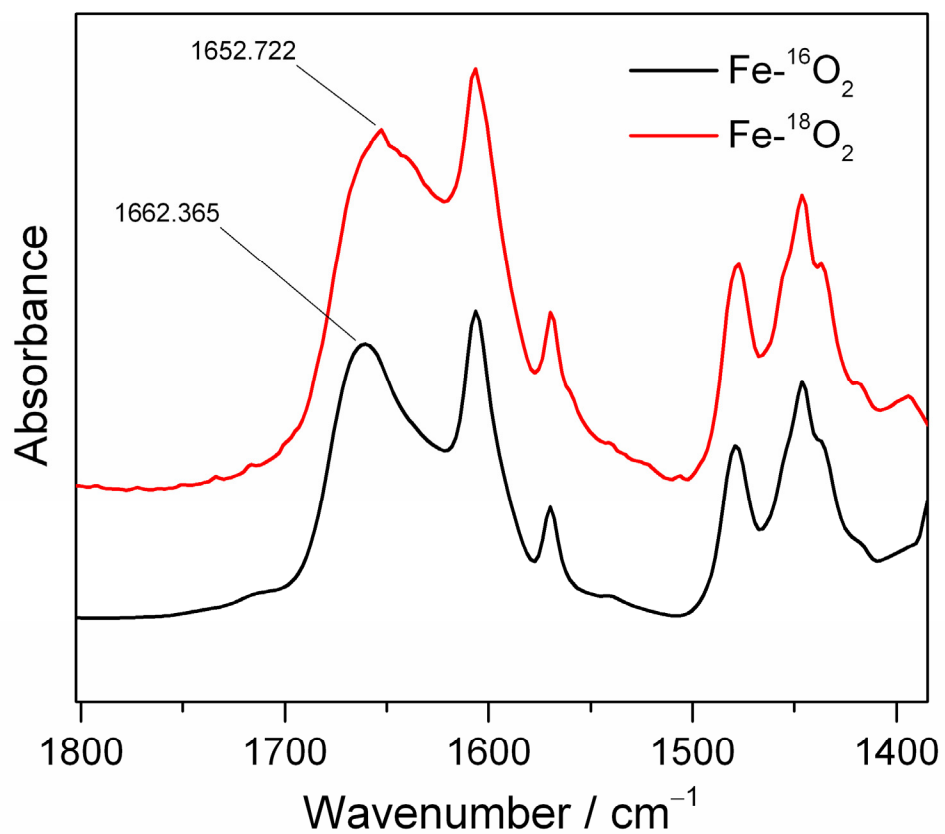

**Figure S16.** FTIR spectra of Fe(bpmcn)Cl<sub>2</sub> after illumination with 1.5W through an AM 1.5G filter in acetonitrile under (black) <sup>32</sup>O<sub>2</sub> and (red) <sup>36</sup>O<sub>2</sub>. Note the region between 1600 – 1700 cm<sup>-1</sup> where an amide bond typically appears in the IR spectrum.



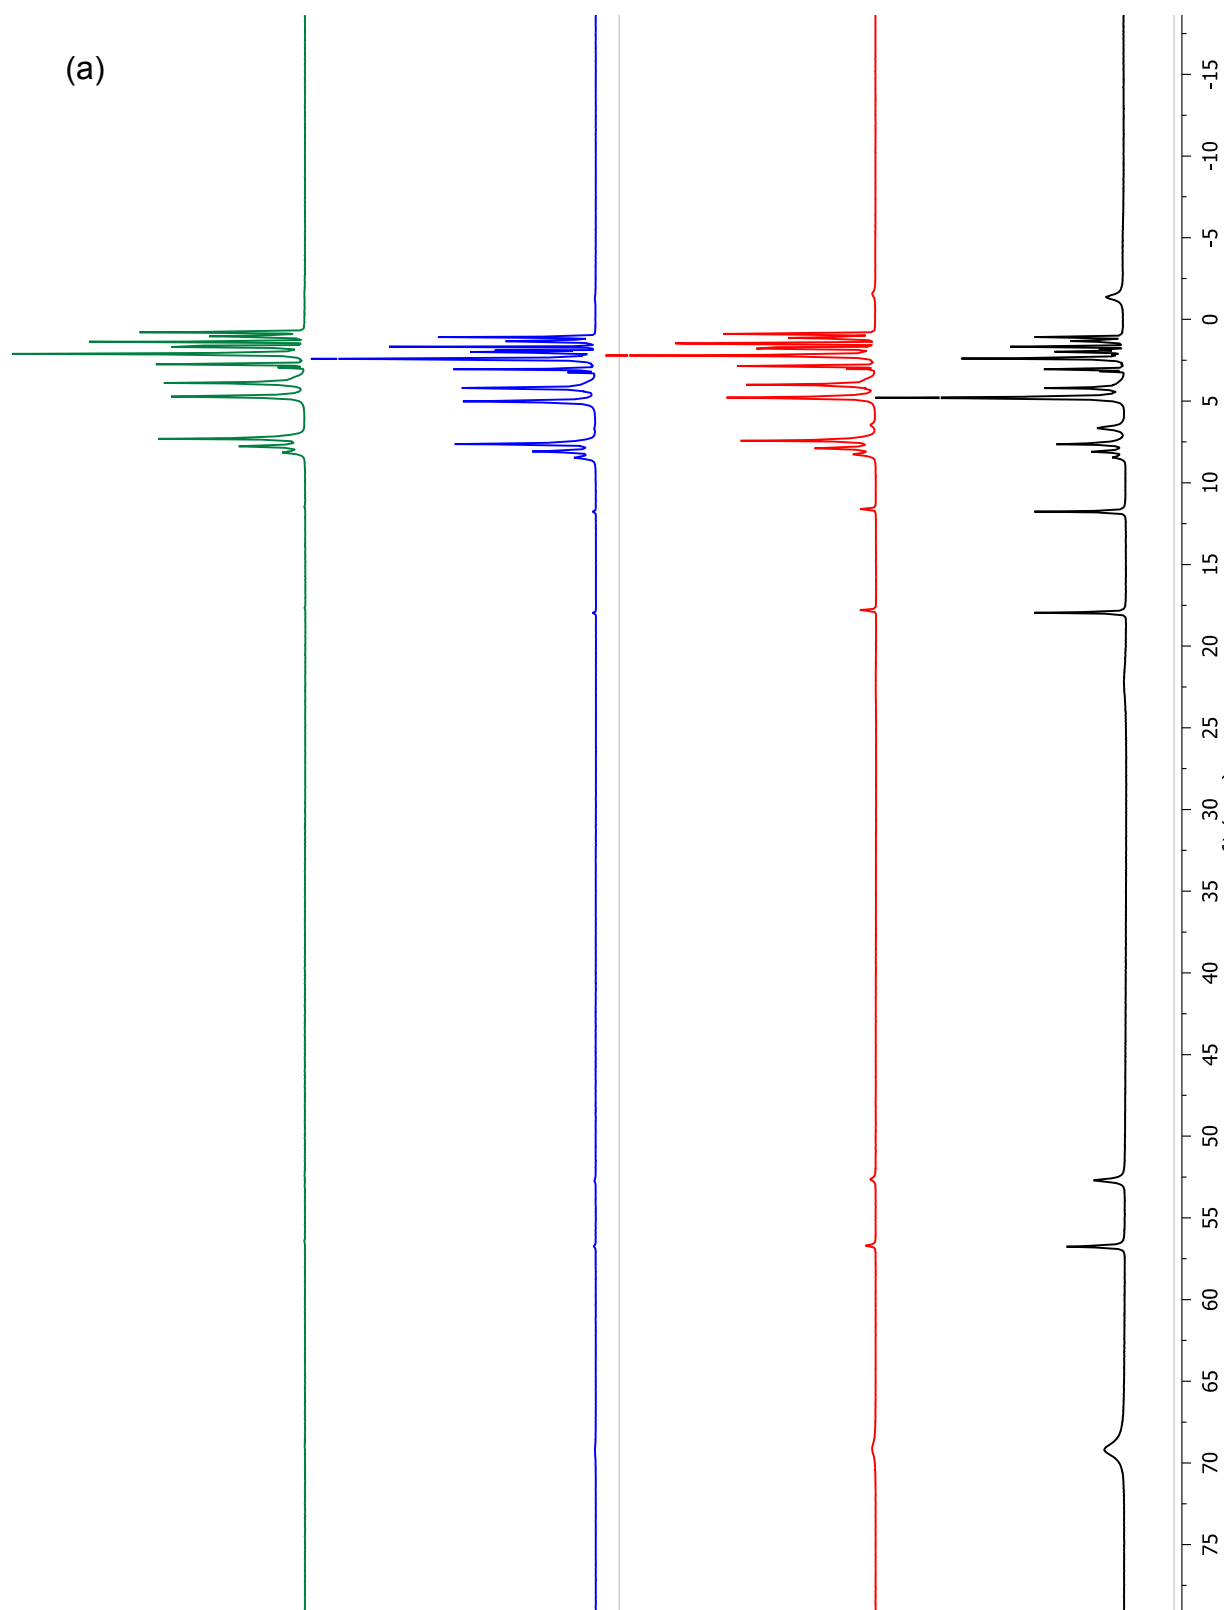

**Figure S17.**  $^1\text{H}$  NMR spectra of a solution of  $\text{Fe}(\text{bpmcn})\text{Cl}_2$  in degassed  $\text{D}_2\text{O}$  with 0.1 M  $d$ -TFA (pH = 1) in the dark for  $t=0$  minutes (black), 2 hours (red), 4 hours (blue), and 8 hours (green).

(b)

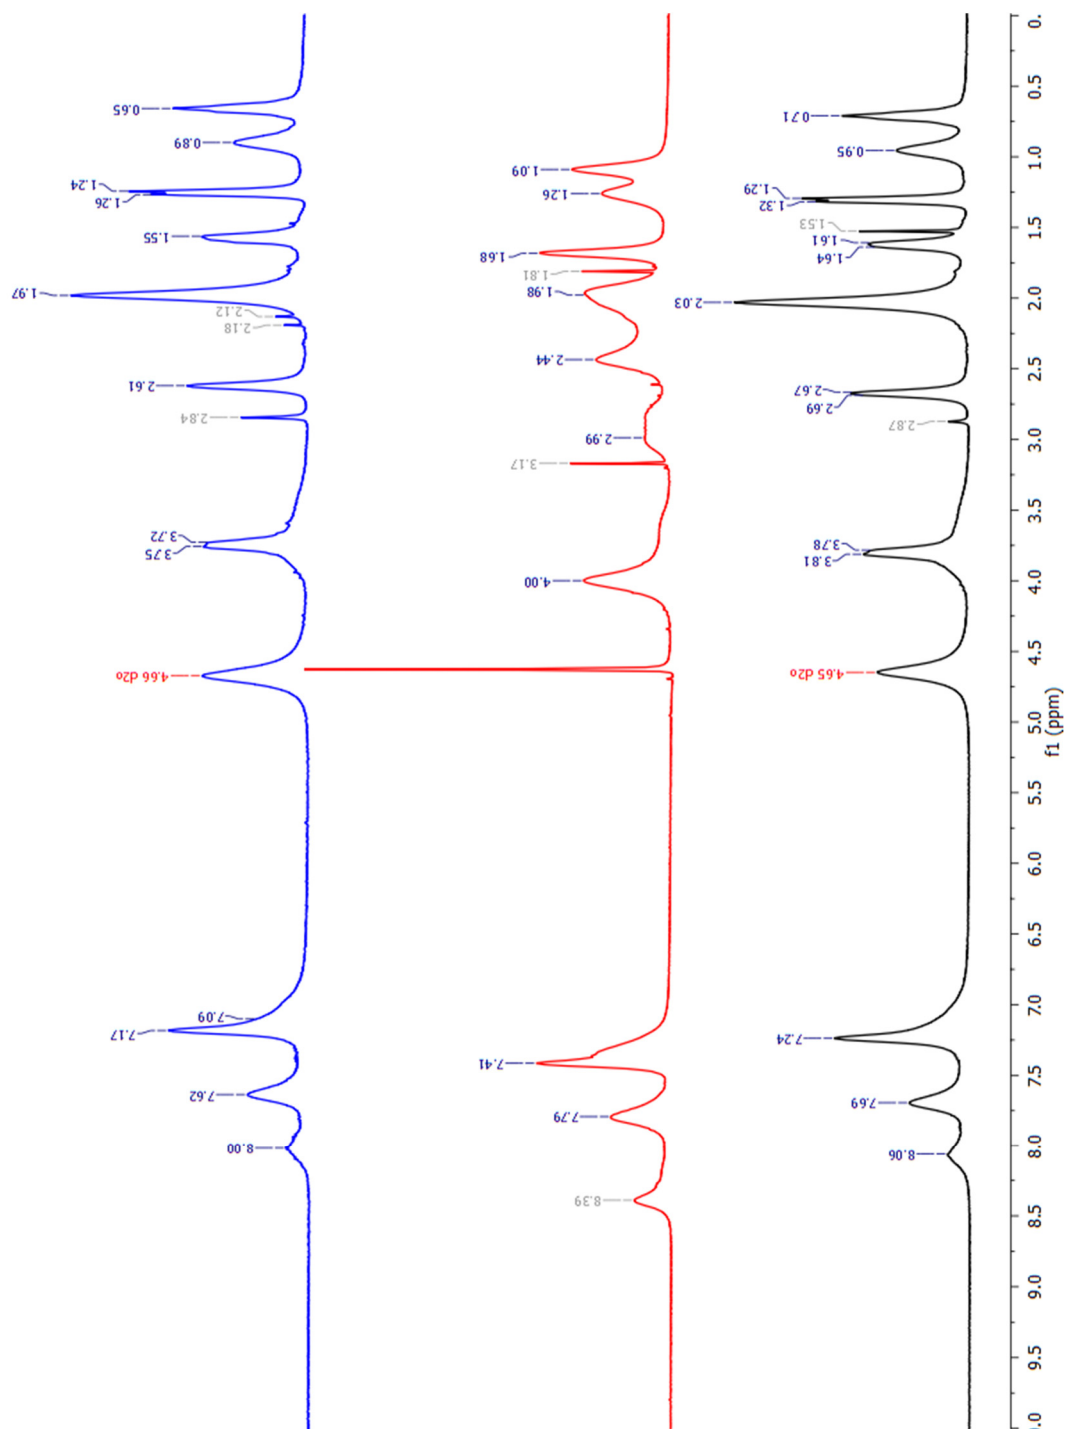

**Figure S18**  $^1\text{H}$  NMR spectra of (black)  $\text{Fe}(\text{bpmcn})\text{Cl}_2$  in 0.1 M  $d\text{-TFA}$  for 8 hours, (red) free bpmcn in 0.1M  $d\text{-TFA}$ , and (blue)  $\text{FeCl}_2 + \text{bpmcn}$  in 0.1M  $d\text{-TFA}$ .

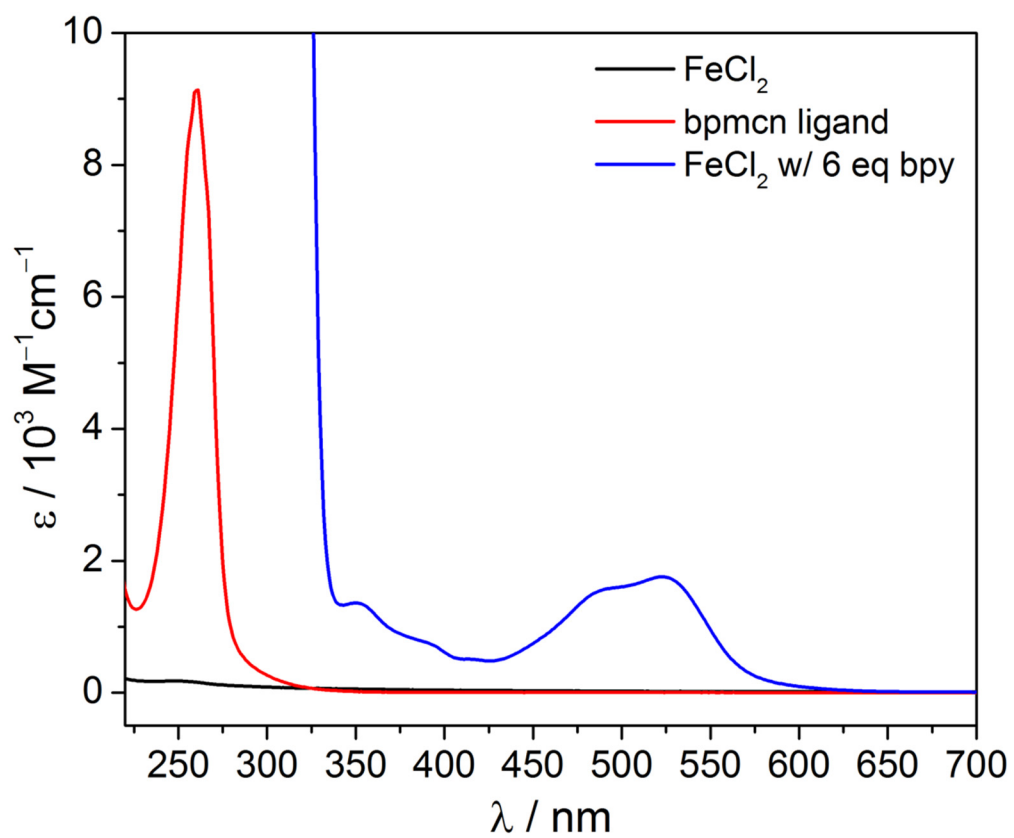

**Figure S19.** UV-Vis spectrum of (black)  $\text{FeCl}_2(\text{aq})$ , (red) bpmcn ligand, and (blue)  $\text{FeCl}_2$  with 6 equivalents of 2,2' bpy in TfOH at pH 1 under  $\text{N}_2$ .

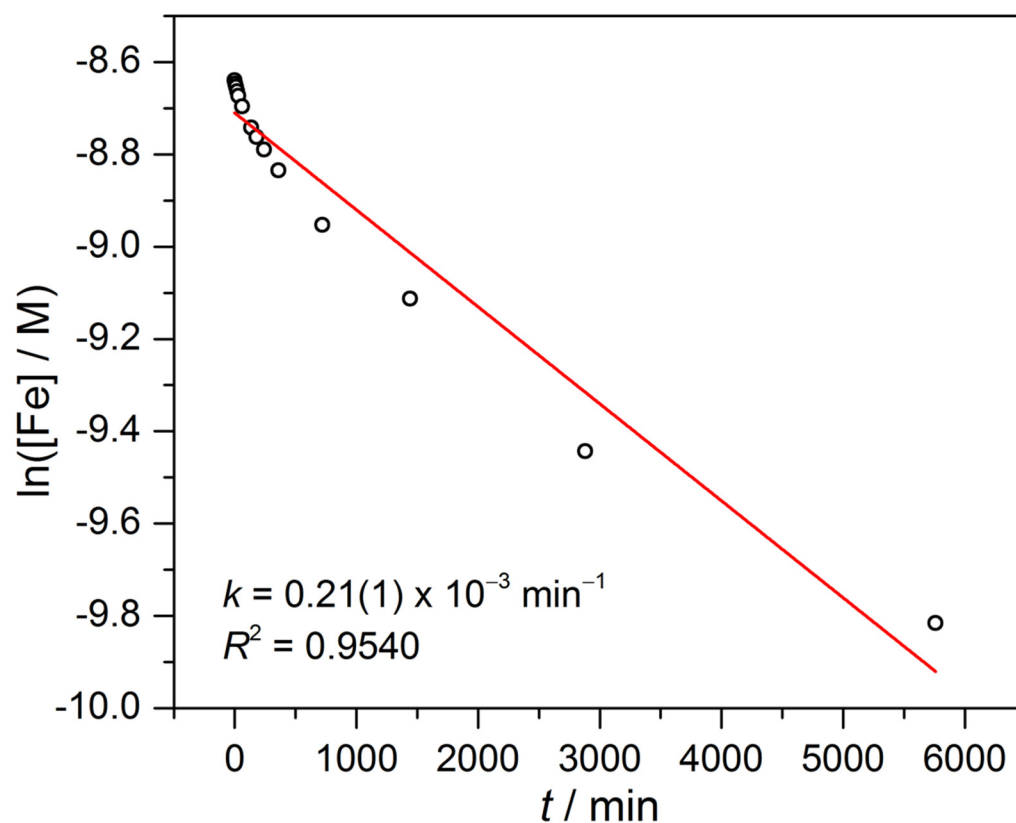

**Figure S20.**  $\ln([\text{Fe}])$  vs time of the  $\lambda_{\text{max}} = 364 \text{ nm}$  absorption of  $\text{Fe}(\text{bpmcn})\text{Cl}_2$  ( $\text{Fe}$ ) in pH 3 TfOH under  $\text{N}_2$  over 4 days. Linear fitting:  $\ln([\text{Fe}]) = -0.00021t - 8.709$ ;  $R^2 = 0.9540$ . The data deviate significantly from first-order kinetics after 1 h.

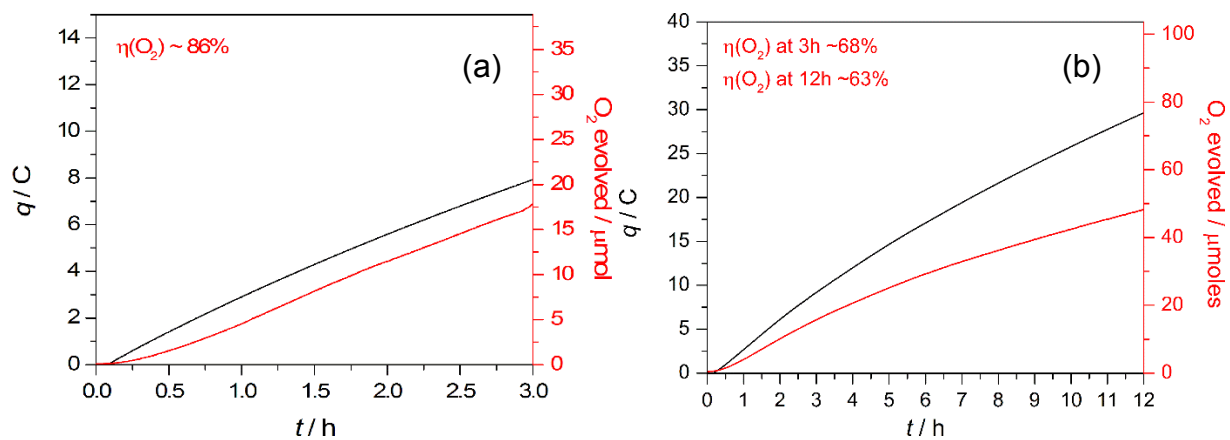

**Figure S21.** OER data collected of an Fe|WO<sub>3</sub> electrode in 100 mM NaSO<sub>4</sub> pH 3 during bulk electrolysis held at 1.23 V vs RHE, SCE RE, Pt CE for 12 hours with charged passed (black) and oxygen evolved (red). Reproduced with permission from ref. 19. Copyright 2014 American Chemical Society.
